# Supplementary material for: Nickel-catalyzed coupling of isocyanates with 1,3-iodoesters and halobenzenes: a novel method for the synthesis of imide and amide derivatives
Source: Royal Society of Chemistry journal article supplement (doi:10.1039/b506903c), 2005-01-01
Supplement: b506903c.pdf [file b506903c.pdf]

**Supplementary Information**

**Nickel-catalyzed coupling of isocyanates with 1,3-iodoesters and halobenzenes: a novel method for the synthesis of imide and amide derivatives**

Jen-Chieh Hsieh and Chien-Hong Cheng\*

Department of Chemistry, National Tsing Hua University, Hsinchu, 30013 Taiwan

E-mail: chcheng@mx.nthu.edu.tw

**Experimental section**

**General procedure for the cycloaddition of isocyanates with iodobenzoates:** To a screw-capped vial were added NiBr<sub>2</sub>(dppe) (62 mg, 0.10 mmol), dppe (40 mg, 0.10 mmole), Zn (128 mg, 2.0 mmol). The vial was sealed with septum and flushed several times with nitrogen. Iodobenzoate (1.0 mmol), isocyanate (5.0 mmol), triethylamine (10 mg, 0.10 mmol) and acetonitrile (2.0 mL) were injected into the reaction mixture via a syringe (Solid isocyanates and dimethoxyiodobenzoate could be added to vial immediately after the catalyst.). The septum was removed, and the vial was sealed with a screw cap quickly under nitrogen. The reaction mixture was stirred at 80 °C for 36 h. The crude reaction mixture was diluted with CH<sub>2</sub>Cl<sub>2</sub>, filtered through a thin Celite pad, and concentrated *in vacuo*. The residue was chromatographed on a silica gel column using hexane and EA as the eluent to give the pure product. (Since isocyanates are toxic, the reaction and the following work-up should be carried out in a well-ventilated hood).

Products **3a-o** were obtained according to this procedure. Spectral data for these compounds are listed below.

**General procedure for the synthesis of amide:** NiBr<sub>2</sub>(dppe) (62 mg, 0.10 mmol), dppe (40 mg, 0.10 mmole) and Zn (128 mg, 2.0 mmol) were placed in a screw-capped vial. The vial was sealed with a septum and flushed several times with nitrogen. Bromobenzene or iodobenzene (1.0 mmol), isocyanate (2.0 mmol) and acetonitrile (2.0 mL) were injected into the reaction mixture via a syringe (Solid isocyanates and solid halobenzene could be added to the vial immediately after the catalyst.). The septum was removed, and the vial was sealed with a screw cap quickly under nitrogen. The reaction mixture was stirred at 80 °C for 16 h. The crude reaction mixture was diluted with CH<sub>2</sub>Cl<sub>2</sub>, filtered through a thin Celite pad, and concentrated *in vacuo*. The residue was chromatographed on a silica gel column using hexane and EA as the eluent to give the pure product.

Products **9a-f** were obtained according to this procedure. Spectral data for these compounds are listed below.

**2-Cyclohexylisoindoline-1,3-dione (3a):**

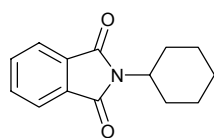

white solid, mp: 169-171 °C; IR (KBr): 1770 (m,  $\nu_{C=O}$ ), 1707 (s,  $\nu_{C=O}$ ) cm<sup>-1</sup>; <sup>1</sup>H NMR (500 MHz, CDCl<sub>3</sub>):  $\delta$ 1.23-1.39 (m, 3 H), 1.68 (d,  $J$  = 8 Hz, 3 H), 1.83 (d,  $J$  = 8 Hz, 2 H), 2.18 (d, q,  $J_1$  = 12 Hz,  $J_2$  = 3 Hz, 2 H), 4.08 (t, t,  $J_1$  = 12 Hz,  $J_2$  = 3.5 Hz, 1 H), 7.66 (d, d,  $J_1$  = 6 Hz,  $J_2$  = 3 Hz, 2 H), 7.79 (d, d,  $J_1$  = 6 Hz,  $J_2$  = 3 Hz, 2 H); <sup>13</sup>C NMR (125 MHz, CDCl<sub>3</sub>):  $\delta$ 25.1, 26.0, 29.8, 50.9, 123.0, 132.0, 133.7, 168.5; HRMS: C<sub>14</sub>H<sub>15</sub>NO<sub>2</sub> calculated 229.1103, found 229.1100.

**2-Butylisindoline-1,3-dione (3b):**

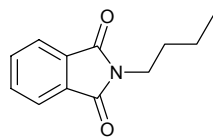

white solid, mp: 105-107 °C; IR (KBr): 1772 (m,  $\nu_{C=O}$ ), 1714 (s,  $\nu_{C=O}$ )  $\text{cm}^{-1}$ ;  $^1\text{H}$  NMR (500 MHz,  $\text{CDCl}_3$ ):  $\delta$ 0.92 (t,  $J = 8$  Hz, 3 H), 1.33 (m, 2 H), 1.63 (m, 2 H), 3.66 (t,  $J = 7.5$  Hz, 2 H), 7.67 (d, d,  $J_1 = 6$  Hz,  $J_2 = 3$  Hz, 2 H), 7.81 (d, d,  $J_1 = 6$  Hz,  $J_2 = 3$  Hz, 2 H);  $^{13}\text{C}$  NMR (125 MHz,  $\text{CDCl}_3$ ):  $\delta$ 13.6, 20.1, 30.6, 37.8, 123.1, 132.2, 133.8, 168.5; HRMS:  $\text{C}_{12}\text{H}_{13}\text{NO}_2$  calculated 203.0946, found 203.0946.

**2-Benzylisindoline-1,3-dione (3c):**

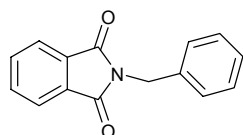

white solid, mp: 113-115 °C; IR (KBr): 1770 (m,  $\nu_{C=O}$ ), 1702 (s,  $\nu_{C=O}$ )  $\text{cm}^{-1}$ ;  $^1\text{H}$  NMR (500 MHz,  $\text{CDCl}_3$ ):  $\delta$ 4.83 (s, 2 H), 7.25 (t,  $J = 6$  Hz, 1 H), 7.31 (t,  $J = 6$  Hz, 2 H), 7.42 (d,  $J = 6$  Hz, 2 H), 7.69 (d, d,  $J_1 = 6$  Hz,  $J_2 = 3$  Hz, 2 H), 7.83 (d, d,  $J_1 = 6$  Hz,  $J_2 = 3$  Hz, 2 H);  $^{13}\text{C}$  NMR (125 MHz,  $\text{CDCl}_3$ ):  $\delta$ 41.6, 123.4, 127.8, 128.6, 128.7, 132.1, 134.0, 136.3, 168.1; HRMS:  $\text{C}_{15}\text{H}_{11}\text{NO}_2$  calculated 237.0790, found 237.0791.

**2-Phenylisindoline-1,3-dione (3d):**

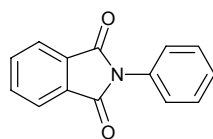

white solid, mp: 208-210 °C; IR (KBr): 1732 (m,  $\nu_{C=O}$ ), 1698 (s,  $\nu_{C=O}$ )  $\text{cm}^{-1}$ ;  $^1\text{H}$  NMR (500 MHz,  $\text{CDCl}_3$ ):  $\delta$ 7.39-7.43 (m, 3 H), 7.49 (t,  $J = 7.5$  Hz, 2 H), 7.78 (d, d,  $J_1 = 6$  Hz,  $J_2 = 3$  Hz, 2 H), 7.95 (d, d,  $J_1 = 6$  Hz,  $J_2 = 3$  Hz, 2 H);  $^{13}\text{C}$  NMR (125 MHz,  $\text{CDCl}_3$ ):  $\delta$ 123.8, 126.6, 128.1, 129.1, 131.8 (2C), 134.4, 167.3; HRMS:  $\text{C}_{14}\text{H}_9\text{NO}_2$  calculated 223.0633, found 223.0630.

**2-p-Tolylisindoline-1,3-dione (3e):**

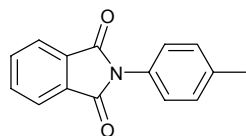

white solid, mp: 207-209 °C; IR (KBr): 1746 (m,  $\nu_{C=O}$ ), 1716 (s,  $\nu_{C=O}$ )  $\text{cm}^{-1}$ ;  $^1\text{H}$  NMR (500 MHz,  $\text{CDCl}_3$ ):  $\delta$ 2.39 (s, 3 H), 7.29 (s, 4 H), 7.76 (d, d,  $J_1 = 6$  Hz,  $J_2 = 3$  Hz, 2 H), 7.93 (d, d,  $J_1 = 6$  Hz,  $J_2 = 3$  Hz, 2 H);  $^{13}\text{C}$  NMR (125 MHz,  $\text{CDCl}_3$ ):  $\delta$ 21.2, 123.7, 126.5, 128.9, 129.8, 131.8, 134.3, 138.2, 167.4; HRMS:  $\text{C}_{15}\text{H}_{11}\text{NO}_2$  calculated 237.0790, found 237.0791.

**2-(4-Methoxyphenyl)isoindoline-1,3-dione (3f):**

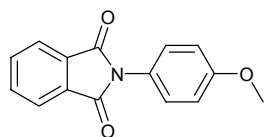

white solid, mp: 143-145 °C; IR (KBr): 1704 (s,  $\nu_{C=O}$ )  $\text{cm}^{-1}$ ;  $^1\text{H}$  NMR (500 MHz,  $\text{CDCl}_3$ ):  $\delta$ 3.83 (s, 3 H), 7.00 (d,  $J = 9$  Hz, 2 H), 7.31 (d,  $J = 9$  Hz, 2 H), 7.76 (d, d,  $J_1 = 6$  Hz,  $J_2 = 3$  Hz, 2 H), 7.93 (d, d,  $J_1 = 6$  Hz,  $J_2 = 3$  Hz, 2 H);  $^{13}\text{C}$  NMR (125 MHz,  $\text{CDCl}_3$ ):  $\delta$ 55.5, 114.5, 123.7, 124.2, 127.9, 131.8, 134.3, 159.2, 167.6; HRMS:  $\text{C}_{15}\text{H}_{11}\text{NO}_3$  calculated 253.0739, found 253.0741.

**2-(4-Chlorophenyl)isoindoline-1,3-dione (3g):**

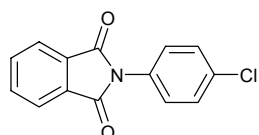

white solid, mp: 194-196 °C; IR (KBr): 1716 (m,  $\nu_{C=O}$ ), 1699 (s,  $\nu_{C=O}$ )  $\text{cm}^{-1}$ ;  $^1\text{H}$  NMR (500 MHz,  $\text{CDCl}_3$ ):  $\delta$ 7.39 (d,  $J = 9$  Hz, 2 H), 7.46 (d,  $J = 9$  Hz, 2 H), 7.79 (d, d,  $J_1 = 6$  Hz,  $J_2 = 3$  Hz, 2 H), 7.94 (d, d,  $J_1 = 6$  Hz,  $J_2 = 3$  Hz, 2 H);  $^{13}\text{C}$  NMR (125 MHz,  $\text{CDCl}_3$ ):  $\delta$ 123.9, 127.7, 129.3, 130.2, 131.6, 134.6, 136.4, 167.0; HRMS:  $\text{C}_{14}\text{H}_8\text{ClNO}_2$  calculated 257.0244, found 257.0242.

**2-(4-Nitrophenyl)isoindoline-1,3-dione (3h):**

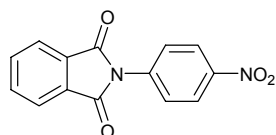

white solid, mp: 250-252 °C; IR (KBr): 1731 (s,  $\nu_{C=O}$ ), 1715 (s,

$\nu_{\text{C=O}}$ , 1520 (s,  $\nu_{\text{N=O}}$ ), 1350 (s,  $\nu_{\text{N=O}}$ )  $\text{cm}^{-1}$ ;  $^1\text{H NMR}$  (500 MHz,  $\text{CDCl}_3$ ):  $\delta$ 7.76 (d,  $J = 9$  Hz, 2 H), 7.83 (d, d,  $J_1 = 6$  Hz,  $J_2 = 3$  Hz, 2 H), 7.99 (d, d,  $J_1 = 6$  Hz,  $J_2 = 3$  Hz, 2 H), 8.36 (d,  $J = 9$  Hz, 2 H);  $^{13}\text{C NMR}$  (125 MHz,  $\text{CDCl}_3$ ):  $\delta$ 124.2, 124.4, 126.3, 131.3, 135.0, 137.5, 146.4, 166.4; HRMS:  $\text{C}_{14}\text{H}_8\text{N}_2\text{O}_4$  calculated 268.0484, found 268.0485.

**2-(4-Acetylphenyl)isoindoline-1,3-dione (3i):**

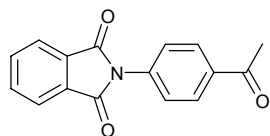

white solid, mp: 245-247 °C; IR (KBr): 1748 (m,  $\nu_{\text{C=O}}$ ), 1732 (m,  $\nu_{\text{C=O}}$ ), 1716 (s,  $\nu_{\text{C=O}}$ ), 1683 (s,  $\nu_{\text{C=O}}$ )  $\text{cm}^{-1}$ ;  $^1\text{H NMR}$  (500 MHz,  $\text{CDCl}_3$ ):  $\delta$ 2.63 (s, 3 H), 7.61 (d,  $J = 9$  Hz, 2 H), 7.81 (d, d,  $J_1 = 6$  Hz,  $J_2 = 3$  Hz, 2 H), 7.97 (d, d,  $J_1 = 6$  Hz,  $J_2 = 3$  Hz, 2 H), 8.09 (d,  $J = 9$  Hz, 2 H);  $^{13}\text{C NMR}$  (125 MHz,  $\text{CDCl}_3$ ):  $\delta$ 30.0, 124.0, 126.1, 128.4, 129.2, 131.6, 134.7, 136.0, 166.9, 198.5; HRMS:  $\text{C}_{16}\text{H}_{11}\text{NO}_3$  calculated 265.0739, found 265.0744.

**2-(Triethoxysilyl)isoindoline-1,3-dione (3j):**

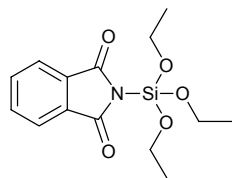

yellow oil; IR (KBr): 1768 (s,  $\nu_{\text{C=O}}$ ), 1702 (s,  $\nu_{\text{C=O}}$ ), 1103, 1079 (s,  $\nu_{\text{Si-O}}$ )  $\text{cm}^{-1}$ ;  $^1\text{H NMR}$  (500 MHz,  $\text{CDCl}_3$ ):  $\delta$ 1.19 (t,  $J = 7.5$  Hz, 9 H), 3.79 (q,  $J = 7$  Hz, 6 H), 7.68 (d, d,  $J_1 = 6$  Hz,  $J_2 = 3$  Hz, 2 H), 7.82 (d, d,  $J_1 = 6$  Hz,  $J_2 = 3$  Hz, 2 H);  $^{13}\text{C NMR}$  (125 MHz,  $\text{CDCl}_3$ ):  $\delta$ 18.2, 58.4, 123.1, 132.1, 133.8, 168.4; HRMS:  $\text{C}_{14}\text{H}_{19}\text{NO}_5\text{Si}$  calculated 309.1032, found 309.1032.

**2-Cyclohexyl-4,5-dimethoxyisoindoline-1,3-dione (3k):**

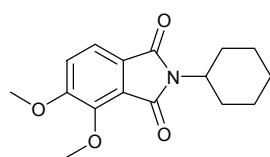

white solid, mp: 95-97 °C; IR (KBr): 1763 (m,  $\nu_{\text{C=O}}$ ), 1704 (s,

$\nu_{C=O}$ , 1270 (s,  $\nu_{C-O}$ )  $\text{cm}^{-1}$ ;  $^1\text{H NMR}$  (500 MHz,  $\text{CDCl}_3$ ):  $\delta$ 1.23-1.35 (m, 3 H), 1.68 (d,  $J = 8$  Hz, 3 H), 1.81 (d,  $J = 8$  Hz, 2 H), 2.17 (d, q,  $J_1 = 12$  Hz,  $J_2 = 3.5$  Hz, 2 H), 3.90 (s, 3 H), 4.02 (t, t,  $J_1 = 12$  Hz,  $J_2 = 3.5$  Hz, 1 H), 4.09 (s, 3 H), 7.05 (d,  $J = 8$  Hz, 1 H), 7.46 (d,  $J = 8$  Hz, 1 H);  $^{13}\text{C NMR}$  (125 MHz,  $\text{CDCl}_3$ ):  $\delta$ 25.1, 26.0, 29.7, 50.8, 56.5, 62.4, 115.6, 119.1, 122.0, 124.7, 146.9, 157.6, 166.3, 167.7; HRMS:  $\text{C}_{16}\text{H}_{19}\text{NO}_4$  calculated 289.1314, found 289.1308.

**4,5-Dimethoxy-2-p-tolylisoindoline-1,3-dione (3l):**

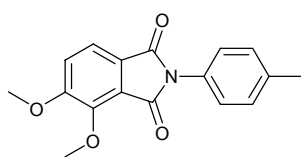

white solid, mp: 173-175 °C; IR (KBr): 1764 (m,  $\nu_{C=O}$ ), 1717 (s,  $\nu_{C=O}$ ), 1270 (s,  $\nu_{C-O}$ )  $\text{cm}^{-1}$ ;  $^1\text{H NMR}$  (500 MHz,  $\text{CDCl}_3$ ):  $\delta$ 2.38 (s, 3 H), 3.95 (s, 3 H), 4.15 (s, 3 H), 7.14 (d,  $J = 8$  Hz, 1 H), 7.28 (s, 4 H), 7.62 (d,  $J = 8$  Hz, 1 H);  $^{13}\text{C NMR}$  (125 MHz,  $\text{CDCl}_3$ ):  $\delta$ 21.2, 56.6, 62.6, 116.1, 119.9, 121.7, 124.2, 126.5, 129.1, 129.7, 138.0, 147.5, 157.9, 165.4, 166.8; HRMS:  $\text{C}_{17}\text{H}_{15}\text{NO}_4$  calculated 297.1001, found 297.1002.

**5-chloro-2-cyclohexylisoindoline-1,3-dione (3m):**

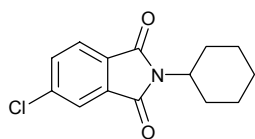

white solid, mp: 118-120 °C; IR (KBr): 1770 (m,  $\nu_{C=O}$ ), 1702 (s,  $\nu_{C=O}$ )  $\text{cm}^{-1}$ ;  $^1\text{H NMR}$  (500 MHz,  $\text{CDCl}_3$ ):  $\delta$ 1.20-1.38 (m, 3 H), 1.68 (d,  $J = 8$  Hz, 3 H), 1.84 (d,  $J = 8$  Hz, 2 H), 2.18 (d, q,  $J_1 = 12$  Hz,  $J_2 = 3.5$  Hz, 2 H), 4.07 (t, t,  $J_1 = 12$  Hz,  $J_2 = 3.5$  Hz, 1 H), 7.63 (d, d,  $J_1 = 6$  Hz,  $J_2 = 1.5$  Hz, 1 H), 7.72 (d,  $J = 8$  Hz, 1 H), 7.75 (d,  $J = 1.5$  Hz, 1 H);  $^{13}\text{C NMR}$  (125 MHz,  $\text{CDCl}_3$ ):  $\delta$ 25.0, 25.9, 29.8, 51.2, 123.5, 124.3, 130.1, 133.7, 133.8, 140.4, 167.1, 167.5; HRMS:  $\text{C}_{14}\text{H}_{14}\text{ClNO}_2$  calculated 263.0713, found 263.0716.

**1-Cyclohexyl-1*H*-pyrrole-2,5-dione (3n):**

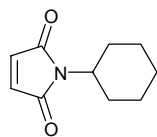

white solid, mp: 86-88 °C; IR (KBr): 1771 (m,  $\nu_{C=O}$ ), 1697 (s,  $\nu_{C=O}$ )  $\text{cm}^{-1}$ ;

$^1\text{H}$  NMR (500 MHz,  $\text{CDCl}_3$ ):  $\delta$ 1.19-1.34 (m, 3 H), 1.63-1.65 (m, 3 H), 1.80-1.82 (m, 2 H), 1.99-2.04 (m, 2 H), 3.82 (t, t,  $J_1 = 12$  Hz,  $J_2 = 4$  Hz, 1 H), 6.60 (s, 2H);  $^{13}\text{C}$  NMR (125 MHz,  $\text{CDCl}_3$ ):  $\delta$ 25.0, 25.9, 29.9, 50.8, 133.9, 170.9; HRMS:  $\text{C}_{10}\text{H}_{13}\text{NO}_2$  calculated 179.0946, found 179.0946.

**1-Phenyl-1*H*-pyrrole-2,5-dione (3o):**

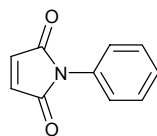

yellow solid, mp: 89-91 °C; IR (KBr): 1764 (m,  $\nu_{C=O}$ ), 1716 (s,  $\nu_{C=O}$ )

$\text{cm}^{-1}$ ;  $^1\text{H}$  NMR (500 MHz,  $\text{CDCl}_3$ ):  $\delta$ 6.84 (s, 2H), 7.32 (d,  $J = 7.5$  Hz, 2 H), 7.33 (m, 1 H), 7.45 (t,  $J = 7.5$  Hz, 2 H);  $^{13}\text{C}$  NMR (125 MHz,  $\text{CDCl}_3$ ):  $\delta$ 126.1, 128.0, 129.1, 131.2, 134.2, 169.5; HRMS:  $\text{C}_{10}\text{H}_7\text{NO}_2$  calculated 173.0477, found 173.0479.

***N*-Cyclohexylbenzamide (9a):**

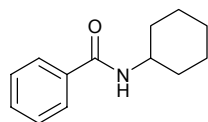

white solid, mp: 135-137 °C; IR (KBr): 1627 (s,  $\nu_{C=O}$ ), 1538  $\text{cm}^{-1}$ ;  $^1\text{H}$

NMR (500 MHz,  $\text{CDCl}_3$ ):  $\delta$ 1.17-1.24 (m, 3 H), 1.30-1.37 (m, 2 H), 1.57-1.62 (m, 1 H), 1.63-1.65 (m, 2 H), 1.87-2.02 (m, 2 H), 3.88-3.91 (m, 1 H), 6.28 (s, broad, N-H, 1 H), 7.33 (t,  $J = 7.5$  Hz, 2 H), 7.41 (t,  $J = 7.5$  Hz, 1 H), 7.72 (d,  $J = 7.5$  Hz, 2 H);  $^{13}\text{C}$  NMR (125 MHz,  $\text{CDCl}_3$ ):  $\delta$ 24.8, 25.4, 33.0, 48.6, 126.8, 128.3, 131.0, 134.9, 166.6; HRMS:  $\text{C}_{13}\text{H}_{17}\text{NO}$  calculated 203.1310, found 203.1310.

***N-p*-Tolylbenzamide (9b):**

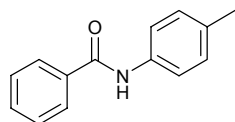

white solid, mp: 141.5-143.5 °C; IR (KBr): 1651 (s,  $\nu_{C=O}$ ), 1542  $\text{cm}^{-1}$ ;  $^1\text{H}$  NMR (500 MHz,  $\text{CDCl}_3$ ):  $\delta$ 2.32 (s, 3 H), 7.16 (d,  $J = 8$  Hz, 2 H), 7.45-7.54 (m, 5H), 7.76 (s, broad, N-H, 1 H), 7.84 (d,  $J = 8$  Hz, 2 H);  $^{13}\text{C}$  NMR (125 MHz,  $\text{CDCl}_3$ ):  $\delta$ 20.9, 120.2, 127.0, 128.8, 129.6, 131.7, 134.3, 135.0, 135.3, 165.6; HRMS:  $\text{C}_{14}\text{H}_{13}\text{NO}$  calculated 211.0997, found 211.0998.

### 3-Methyl-*N-p*-tolylbenzamide (9c):

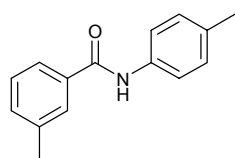

yellow oil; IR (KBr): 1635 (s,  $\nu_{C=O}$ ), 1534  $\text{cm}^{-1}$ ;  $^1\text{H}$  NMR (500 MHz,  $\text{CDCl}_3$ ):  $\delta$ 2.32 (s, 3 H), 2.40 (s, 3 H), 7.14 (d,  $J = 8$  Hz, 2 H), 7.32-7.34 (m, 2 H), 7.50 (d,  $J = 8$  Hz, 2 H), 7.61 (d,  $J = 8$  Hz, 1 H), 7.66 (s, 1 H), 7.78 (s, broad, N-H, 1 H);  $^{13}\text{C}$  NMR (125 MHz,  $\text{CDCl}_3$ ):  $\delta$ 20.9, 21.4, 120.2, 123.9, 127.7, 128.9, 129.5, 132.4, 134.1, 135.0, 135.4, 138.6, 165.8; HRMS:  $\text{C}_{15}\text{H}_{15}\text{NO}$  calculated 225.1154, found 225.1152.

### 4-Phenyl-*N-p*-tolylbenzamide (9d):

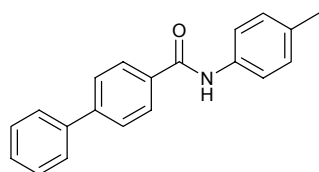

white solid, mp: 217.5-218.5 °C; IR (KBr): 1652 (s,  $\nu_{C=O}$ ), 1542  $\text{cm}^{-1}$ ;  $^1\text{H}$  NMR (500 MHz,  $\text{CDCl}_3$ ):  $\delta$ 2.33 (s, 3 H), 7.17 (d,  $J = 7.5$  Hz, 2 H), 7.38 (t,  $J = 7$  Hz, 1 H), 7.46 (t,  $J = 7$  Hz, 2 H), 7.52 (d,  $J = 7.5$  Hz, 2 H), 7.62 (d,  $J = 7.5$  Hz, 2 H), 7.69 (d,  $J = 7.5$  Hz, 2 H), 7.80 (s, broad, N-H, 1 H), 7.93 (d,  $J = 7.5$  Hz, 2 H);  $^{13}\text{C}$  NMR (125 MHz,  $\text{CDCl}_3$ ):  $\delta$ 20.9, 120.2, 127.2, 127.4, 127.5, 128.1, 128.9, 129.6, 133.7, 134.3, 135.3, 139.9, 144.6, 165.3; HRMS:  $\text{C}_{20}\text{H}_{17}\text{NO}$  calculated 287.1310, found 287.1311.



***N*-*p*-Tolyl-2-naphthamide (9e):**

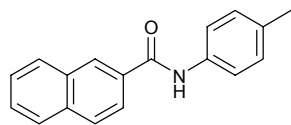

white solid, mp: 178-180 °C; IR (KBr): 1653 (s,  $\nu_{\text{C=O}}$ ), 1542

$\text{cm}^{-1}$ ;  $^1\text{H}$  NMR (500 MHz,  $\text{CDCl}_3$ ):  $\delta$  2.34 (s, 3 H), 7.18 (d,  $J = 7.5$  Hz, 2 H), 7.54-7.56 (m, 4 H), 7.87-7.94 (m, 5 H), 8.35 (s, 1H);  $^{13}\text{C}$  NMR (125 MHz,  $\text{CDCl}_3$ ):  $\delta$  20.9, 120.3, 123.5, 126.9, 127.5, 127.8, 127.8, 128.7, 128.9, 129.6, 132.3, 132.7, 134.3, 134.8, 135.4, 165.7; HRMS:  $\text{C}_{18}\text{H}_{15}\text{NO}$  calculated 261.1154, found 261.1155.

**1,3,5-Triphenyl-1,3,5-triazinane-2,4,6-trione (5d):**

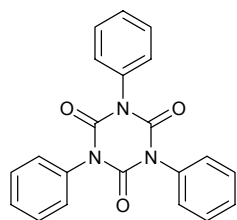

white solid, mp: 282-284 °C; IR (KBr): 1702 (s,  $\nu_{\text{C=O}}$ )  $\text{cm}^{-1}$ ;  $^1\text{H}$

NMR (500 MHz,  $\text{CDCl}_3$ ):  $\delta$  7.88 (d,  $J = 7.5$  Hz, 6 H), 7.44 (t,  $J = 7.5$  Hz, 3 H), 7.49 (t,  $J = 7.5$  Hz, 6 H);  $^{13}\text{C}$  NMR (125 MHz,  $\text{CDCl}_3$ ):  $\delta$  128.4, 129.3, 133.6, 148.7; HRMS:  $\text{C}_{21}\text{H}_{15}\text{N}_3\text{O}_3$  calculated 257.1113 found 257.1116.
